# Supplementary material for: Fine‐Tunable and Injectable 3D Hydrogel for On‐Demand Stem Cell Niche
Source: PubMed Central journal article supplement (PMC6724362; doi:10.1002/advs.201900597), 2019-07-15
Supplement: ADVS-6-1900597-s001.pdf [file ADVS-6-1900597-s001.pdf]

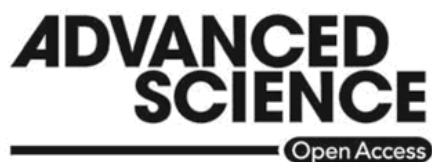

## Supporting Information

for *Adv. Sci.*, DOI: 10.1002/advs.201900597

Fine-Tunable and Injectable 3D Hydrogel for On-Demand  
Stem Cell Niche

*Ki Hyun Hong, Young-Min Kim, and Soo-Chang Song\**

## Supporting Information

### **Fine-Tunable and Injectable 3D Hydrogel for On-Demand Stem Cell Niche**

*Ki Hyun Hong, Young-Min Kim, and Soo-Chang Song\**

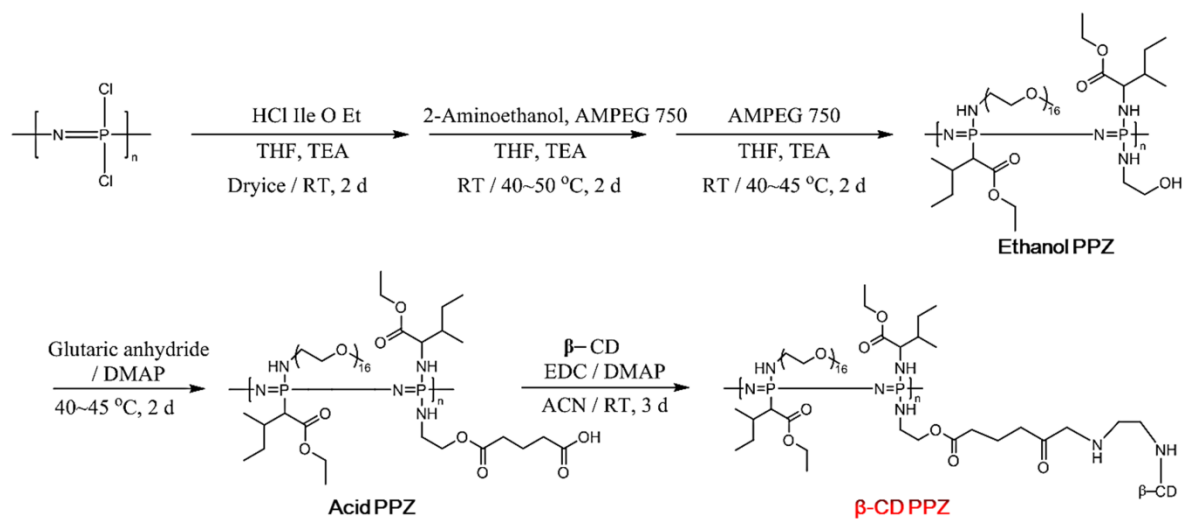

**Scheme S1.** Synthesis scheme for thermosensitive acid PPZ and  $\beta\text{-CD PPZ}$

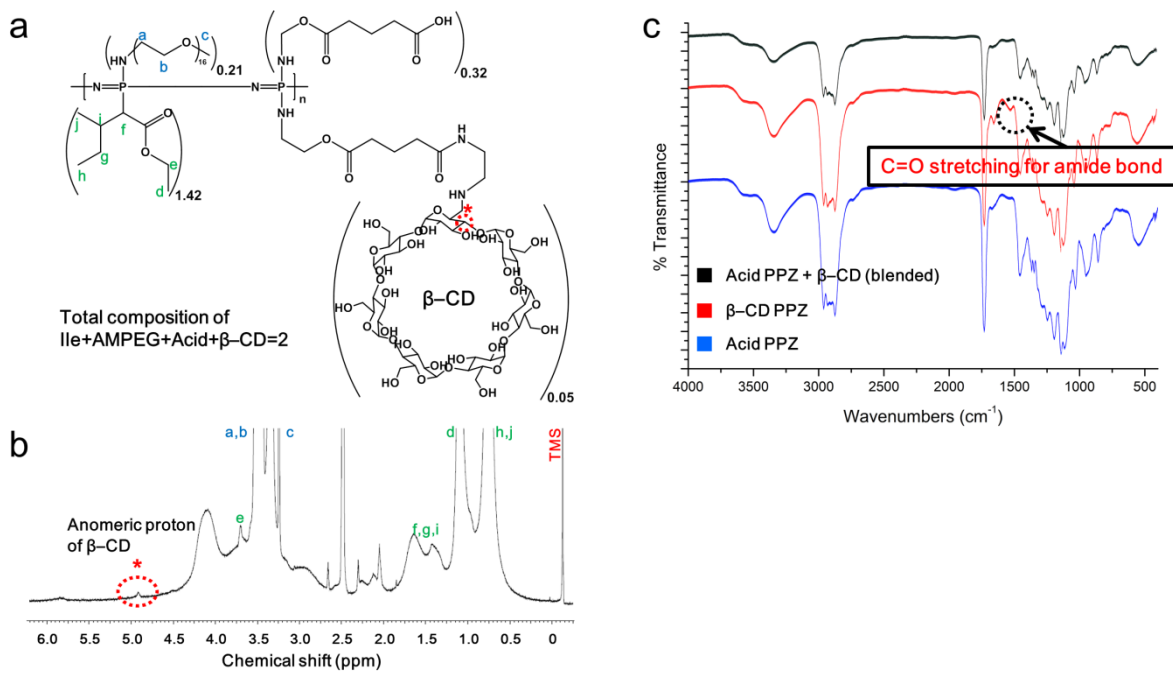

**Figure S1.** a) Chemical structure of  $\beta$ -CD PPZ. b)  $^1\text{H}$ -NMR spectra result for  $\beta$ -CD PPZ. c) FT-IR results to prove the amide bond generation in  $\beta$ -CD PPZ.

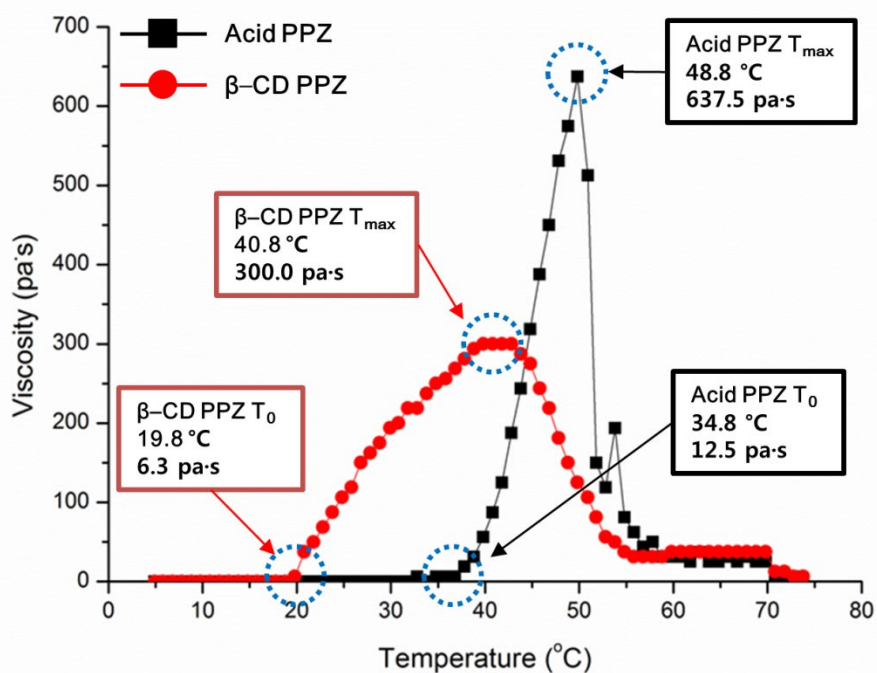

**Figure S2.** Thermosensitive gelation details for acid PPZ (the former β-CD PPZ before β-CD conjugation) and β-CD PPZ. T<sub>0</sub>, a gelation starting temperature, and T<sub>max</sub>, a temperature with the maximum viscosity, were indicated above, respectively.

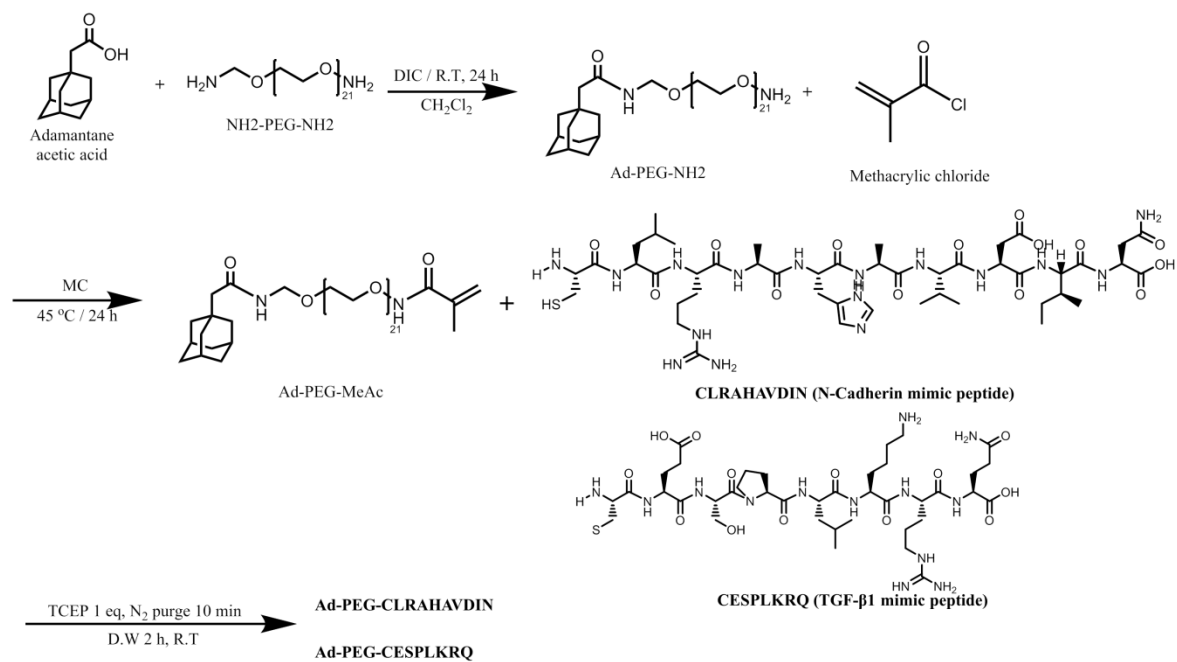

**Scheme S2.** Synthesis scheme for Ad-PEG-NH<sub>2</sub>, Ad-PEG-MeAc, Ad-TGF, and Ad-HAV.

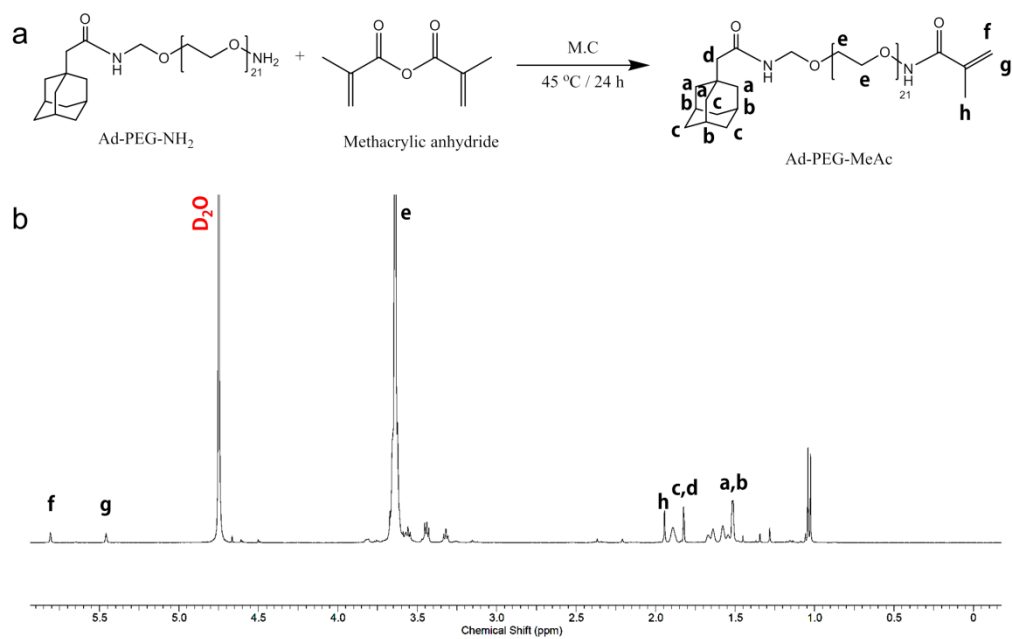

**Figure S3.** a) Synthesis scheme for Ad-PEG-MeAc. b) <sup>1</sup>H-NMR spectra result for Ad-MeAc. Each peaks for a-g is elucidated.

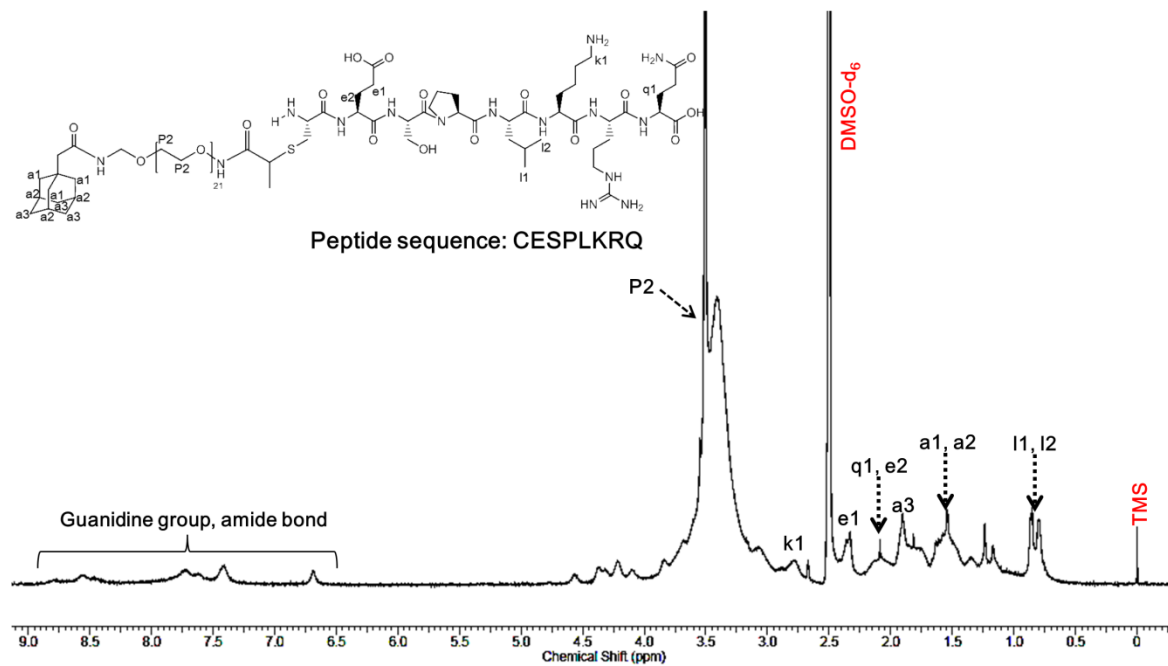

**Figure S4.** Chemical structure and  $^1\text{H-NMR}$  result of Ad-TGF.  $^1\text{H-NMR}$  spectra were measured using DMSO- $d_6$ . TGF peptide specific peaks for guanidine, amide bond and leucine were revealed.



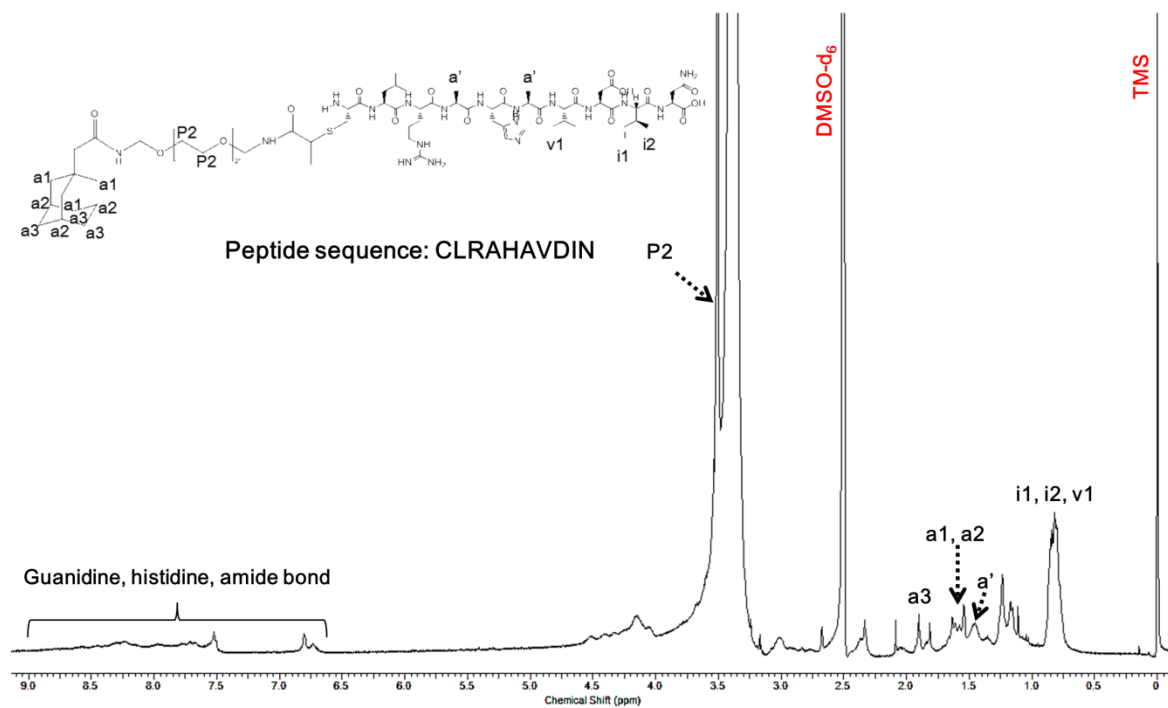

**Figure S5.** Chemical structure and  $^1\text{H-NMR}$  result of Ad-HAV.  $^1\text{H-NMR}$  spectra were measured using DMSO- $d_6$ . HAV peptide specific peaks for guanidine, amide bond and leucine were revealed.

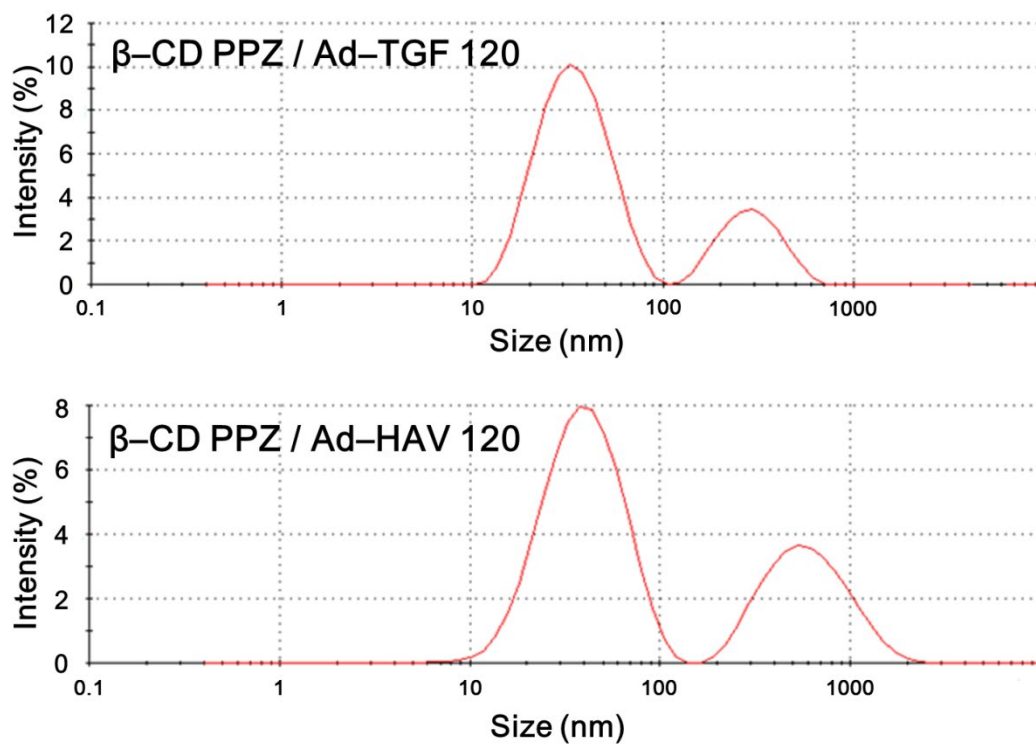

**Figure S6.** Size distribution results induced by excess Ad-peptides compared to  $\beta$ -CD PPZ. (Top:  $\beta$ -CD PPZ / Ad-TGF 120, bottom:  $\beta$ -CD PPZ / Ad-HAV 120)

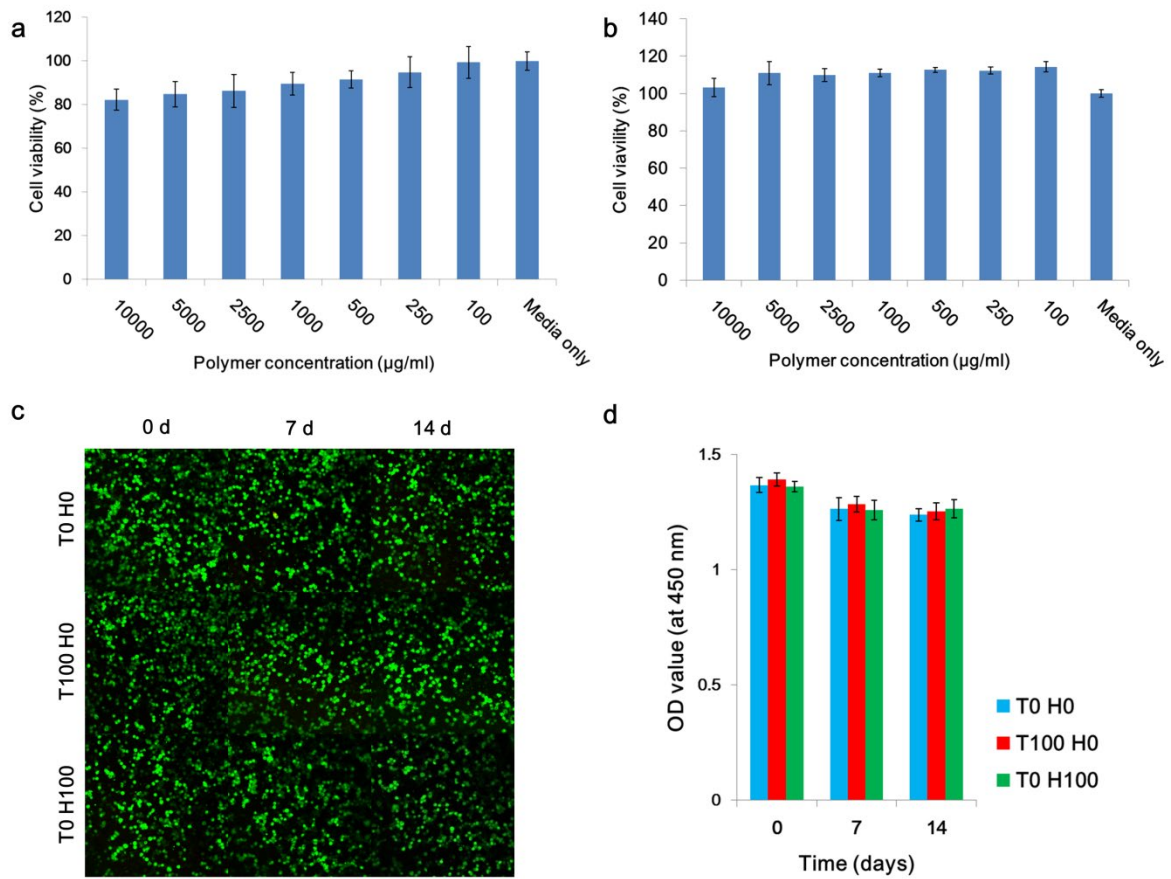

**Figure S7.** In vitro biocompatibility of 2D and 3D state of cells. Cytotoxicity of  $\beta$ -CD PPZ hydrogel under various polymer concentrations (0-10,000  $\mu\text{g/ml}$ ) and 2D plate attached cell lines of (a) MSCs, (b) NIH3T3 (mouse fibroblast) for 24 hours ( $n = 6$ ). Two weeks scheduled MSCs 3D in vitro cytotoxicity with (c) live/dead assay and (d) CCK-8 assay encapsulated with the representative hydrogel groups of  $\beta$ -CD PPZ alone,  $\beta$ -CD PPZ/Ad-TGF 100, and  $\beta$ -CD PPZ/Ad-HAV 100 ( $\beta$ -CD PPZ concentration is 10 wt %,  $n = 3$ ).
